# Supplementary material for: Video-Based Finger Kinematics for Degenerative Cervical Myelopathy: A Smartphone-Based Computer Vision Approach for Screening
Source: Research Square preprint supplement (doi:10.21203/rs.3.rs-7454858/v1), 2025-11-13
Supplement: Supplementary file 1 [file 7c2e943737a2b91f1632ca55.pdf]

Table 1: Definitions and Formulas for Extracted Kinematic Features

| Feature                          | Description                                          | Equation / Definition                                                                                                                                     |
|----------------------------------|------------------------------------------------------|-----------------------------------------------------------------------------------------------------------------------------------------------------------|
| Grip Count                       | Number of grips completed during the task            | $N_{\text{grips}}$ = number of local maxima in the angle $\theta(t)$                                                                                      |
| Mean Grip Interval               | Average time between grips                           | $\bar{T} = \frac{1}{N-1} \sum_{i=1}^{N-1} (t_{i+1} - t_i)$                                                                                                |
| SD Grip Interval                 | Variability in time between grips                    | $\sigma_T = \sqrt{\frac{1}{N-2} \sum_{i=1}^{N-1} ((t_{i+1} - t_i) - \bar{T})^2}$                                                                          |
| Grip Frequency                   | Number of grips per second                           | $f = \frac{1}{\bar{T}}$                                                                                                                                   |
| Opening and Closing Time         | Fraction of task spent opening or closing hand       | $T_{\text{open}} = \frac{\sum t_{\text{open}}}{T_{\text{total}}}, \quad T_{\text{close}} = \frac{\sum t_{\text{close}}}{T_{\text{total}}}$                |
| Avg Opening and Closing Duration | Mean duration per opening/closing cycle              | $\bar{t}_{\text{open}} = \frac{1}{N_{\text{open}}} \sum t_{\text{open}}, \quad \bar{t}_{\text{close}} = \frac{1}{N_{\text{close}}} \sum t_{\text{close}}$ |
| Maximum Angular Amplitude        | Max joint angle range (deg)                          | $A_{\text{max}} = \max(\theta(t)) - \min(\theta(t))$                                                                                                      |
| Total Angular Rotation           | Sum of absolute angle changes                        | $R = \sum_{i=1}^{N-1}  \theta(t_{i+1}) - \theta(t_i) $                                                                                                    |
| Mean Peak Angle                  | Average of local maxima in angle signal              | $\bar{\theta}_{\text{peak}} = \frac{1}{N_p} \sum_{i=1}^{N_p} \theta(t_{p_i})$                                                                             |
| SD of Peak Angle                 | Standard deviation of peak angles                    | $\sigma_{\text{peak}} = \sqrt{\frac{1}{N_p-1} \sum (\theta(t_{p_i}) - \bar{\theta}_{\text{peak}})^2}$                                                     |
| Mean Trough Angle                | Average of local minima in angle signal              | $\bar{\theta}_{\text{trough}} = \frac{1}{N_t} \sum_{j=1}^{N_t} \theta(t_{t_j})$                                                                           |
| SD of Trough Angle               | Standard deviation of trough angles                  | $\sigma_{\text{trough}} = \sqrt{\frac{1}{N_t-1} \sum (\theta(t_{t_j}) - \bar{\theta}_{\text{trough}})^2}$                                                 |
| Peak Slope                       | Slope of linear regression through peaks             | $m_{\text{peak}} = \frac{\sum (t_i - \bar{t})(\theta_i - \bar{\theta})}{\sum (t_i - \bar{t})^2}$                                                          |
| Trough Slope                     | Slope of linear regression through troughs           | (Same as above, applied to trough points)                                                                                                                 |
| Max Angular Velocity             | Max first derivative of angle (deg/s)                | $\omega_{\text{max}} = \max \left  \frac{d\theta}{dt} \right $                                                                                            |
| Avg Max Velocity (Closing)       | Average max velocity during hand closing             | $\bar{\omega}_{\text{close}} = \frac{1}{N_{\text{close}}} \sum \max \left  \frac{d\theta}{dt} \right $                                                    |
| Avg Min Velocity (Opening)       | Average min velocity during hand opening             | $\bar{\omega}_{\text{open}} = \frac{1}{N_{\text{open}}} \sum \min \left( \frac{d\theta}{dt} \right)$                                                      |
| Velocity Energy Balance          | Energy ratio: closing vs. opening                    | $E_{\text{balance}} = \frac{\sum_{\text{closing}} \omega(t)^2}{\sum_{\text{opening}} \omega(t)^2}$                                                        |
| Max Acceleration                 | Max second derivative of angle (deg/s <sup>2</sup> ) | $\alpha_{\text{max}} = \max \left  \frac{d^2\theta}{dt^2} \right $                                                                                        |
| Avg Max Accel (Closing)          | Mean max acceleration during closing                 | $\bar{\alpha}_{\text{close}} = \frac{1}{N_{\text{close}}} \sum \max \left  \frac{d^2\theta}{dt^2} \right $                                                |
| Avg Min Accel (Closing)          | Mean min acceleration during closing                 | $\underline{\alpha}_{\text{close}} = \frac{1}{N_{\text{close}}} \sum \min \left( \frac{d^2\theta}{dt^2} \right)$                                          |
| Avg Max Accel (Opening)          | Mean max acceleration during opening                 | $\bar{\alpha}_{\text{open}} = \frac{1}{N_{\text{open}}} \sum \max \left  \frac{d^2\theta}{dt^2} \right $                                                  |
| Avg Min Accel (Opening)          | Mean min acceleration during opening                 | $\underline{\alpha}_{\text{open}} = \frac{1}{N_{\text{open}}} \sum \min \left( \frac{d^2\theta}{dt^2} \right)$                                            |
| Max Jerk                         | Max third derivative of angle (deg/s <sup>3</sup> )  | $j_{\text{max}} = \max \left  \frac{d^3\theta}{dt^3} \right $                                                                                             |
| Avg Max Jerk (Closing)           | Mean of max jerk in closing phases                   | $\bar{j}_{\text{close}} = \frac{1}{N_{\text{close}}} \sum \max \left  \frac{d^3\theta}{dt^3} \right $                                                     |
| Avg Min Jerk (Closing)           | Mean of min jerk in closing phases                   | $\underline{j}_{\text{close}} = \frac{1}{N_{\text{close}}} \sum \min \left( \frac{d^3\theta}{dt^3} \right)$                                               |
| Avg Max Jerk (Opening)           | Mean of max jerk in opening phases                   | $\bar{j}_{\text{open}} = \frac{1}{N_{\text{open}}} \sum \max \left  \frac{d^3\theta}{dt^3} \right $                                                       |
| Avg Min Jerk (Opening)           | Mean of min jerk in opening phases                   | $\underline{j}_{\text{open}} = \frac{1}{N_{\text{open}}} \sum \min \left( \frac{d^3\theta}{dt^3} \right)$                                                 |
