# Supplementary material for: Video-Based Finger Kinematics for Degenerative Cervical Myelopathy: A Smartphone-Based Computer Vision Approach for Screening
Source: Research Square preprint supplement (doi:10.21203/rs.3.rs-7454858/v1), 2025-11-13
Supplement: Supplementary file 1 [file 129223e582dad28c53887866.docx]

# Regression Summaries

**MSCC R²: 0.356**

- Right_index_ Avg Max Vel Closing: -0.057
- Left_index_ Avg Min Vel Opening: 0.058
- Left_index_ Std Max Vel Closing: 0.018
- Left_index_ Avg Max Acc Opening: 0.056
- Right_index_ Avg Min Acc Opening: -0.050
- Left_middle_ Avg Min Vel Opening: -0.089
- Right_middle_ Energy Balance: 0.021
- Left_middle_ Avg Max Acc Opening: -0.028
- Left_middle_ Avg Max Jerk Closing: -0.016
- Left_pinky_ Energy Balance: -0.014

**Sagittal Diameter (mm) R²: 0.453**

- Left_index_ Std Trough: -0.857
- Right_index_ Energy Balance: 0.153
- Left_index_ Amplitude Acceleration: 0.384
- Right_index_ Avg Max Acc Closing: 0.163
- Left_index_ Avg Min Acc Closing: 0.412
- Right_index_ Avg Max Jerk Closing: -0.304
- Left_middle_ Std Trough: 1.000
- Right_middle_ Avg Min Acc Opening: -0.271
- Right_pinky_ Std Min Vel Opening: 0.208
- Right_thumb_ Std Max Vel Closing: -0.218

**Transverse Diameter (mm) R²: 0.431**

- Left_index_ Avg Min Vel Opening: 0.240
- Left_index_ Std Max Vel Closing: -0.130
- Right_index_ Std Max Vel Closing: -0.378
- Right_index_ Std Min Vel Opening: 0.380
- Left_middle_ Avg Min Vel Opening: 0.986
- Left_middle_ Std Min Vel Opening: -0.402
- Left_ring_ Avg Min Vel Opening: -1.268
- Right_ring_ Energy Balance: 0.703
- Left_pinky_ Std Max Vel Closing: 0.509
- Left_pinky_ Avg Min Acc Closing: 0.783

**Compression Ratio (CR) R²: 0.421**

- Left_index_ Amplitude Velocity: -0.059
- Left_index_ Amplitude Acceleration: 0.030
- Left_index_ Avg Max Acc Opening: 0.031
- Left_middle_ Avg Min Vel Opening: -0.050
- Left_middle_ Std Max Vel Closing: 0.043
- Left_middle_ Std Min Vel Opening: 0.027
- Right_middle_ Std Min Vel Opening: -0.014
- Left_middle_ Amplitude Acceleration: -0.045
- Right_ring_ Std Min Vel Opening: 0.039
- Left_pinky_ Std Max Vel Closing: -0.043

## MSCC Regression Summary

OLS Regression Results
==============================================================================
Dep. Variable: MSCC R-squared: 0.356
Model: OLS Adj. R-squared: 0.212
Method: Least Squares F-statistic: 2.482
Date: Tue, 05 Aug 2025 Prob (F-statistic): 0.0183
Time: 14:57:17 Log-Likelihood: 51.155
No. Observations: 56 AIC: -80.31
Df Residuals: 45 BIC: -58.03
Df Model: 10
Covariance Type: nonrobust
------------------------------------------------------------------------------
 coef std err t P>|t| [0.025 0.975]
------------------------------------------------------------------------------
const 0.7751 0.014 53.570 0.000 0.746 0.804
x1 -0.0571 0.025 -2.305 0.026 -0.107 -0.007
x2 0.0579 0.042 1.381 0.174 -0.027 0.142
x3 0.0182 0.018 1.025 0.311 -0.018 0.054
x4 0.0557 0.042 1.327 0.191 -0.029 0.140
x5 -0.0498 0.021 -2.354 0.023 -0.092 -0.007
x6 -0.0890 0.044 -2.042 0.047 -0.177 -0.001
x7 0.0213 0.020 1.088 0.282 -0.018 0.061
x8 -0.0276 0.041 -0.680 0.500 -0.110 0.054
x9 -0.0165 0.018 -0.939 0.353 -0.052 0.019
x10 -0.0137 0.018 -0.743 0.462 -0.051 0.023
==============================================================================
Omnibus: 3.588 Durbin-Watson: 2.208
Prob(Omnibus): 0.166 Jarque-Bera (JB): 2.591
Skew: -0.440 Prob(JB): 0.274
Kurtosis: 3.579 Cond. No. 10.1
==============================================================================

## Sagittal Diameter (mm) Regression Summary

OLS Regression Results
==============================================================================
Dep. Variable: Sag Diam (mm) R-squared: 0.453
Model: OLS Adj. R-squared: 0.331
Method: Least Squares F-statistic: 3.723
Date: Tue, 05 Aug 2025 Prob (F-statistic): 0.00109
Time: 14:57:18 Log-Likelihood: -60.980
No. Observations: 56 AIC: 144.0
Df Residuals: 45 BIC: 166.2
Df Model: 10
Covariance Type: nonrobust
------------------------------------------------------------------------------
 coef std err t P>|t| [0.025 0.975]
------------------------------------------------------------------------------
const 5.3382 0.107 49.811 0.000 5.122 5.554
x1 -0.8567 0.263 -3.263 0.002 -1.385 -0.328
x2 0.1526 0.138 1.102 0.276 -0.126 0.432
x3 0.3839 0.151 2.537 0.015 0.079 0.689
x4 0.1633 0.244 0.668 0.507 -0.329 0.655
x5 0.4122 0.143 2.877 0.006 0.124 0.701
x6 -0.3036 0.221 -1.374 0.176 -0.749 0.142
x7 0.9996 0.259 3.859 0.000 0.478 1.521
x8 -0.2710 0.118 -2.292 0.027 -0.509 -0.033
x9 0.2085 0.116 1.791 0.080 -0.026 0.443
x10 -0.2178 0.120 -1.819 0.076 -0.459 0.023
==============================================================================
Omnibus: 0.901 Durbin-Watson: 1.832
Prob(Omnibus): 0.637 Jarque-Bera (JB): 0.462
Skew: -0.211 Prob(JB): 0.794
Kurtosis: 3.139 Cond. No. 5.91
==============================================================================

## Transverse Diameter (mm) Regression Summary

OLS Regression Results
==============================================================================
Dep. Variable: Transv Diam (mm) R-squared: 0.431
Model: OLS Adj. R-squared: 0.304
Method: Least Squares F-statistic: 3.407
Date: Tue, 05 Aug 2025 Prob (F-statistic): 0.00219
Time: 14:57:20 Log-Likelihood: -93.855
No. Observations: 56 AIC: 209.7
Df Residuals: 45 BIC: 232.0
Df Model: 10
Covariance Type: nonrobust
------------------------------------------------------------------------------
 coef std err t P>|t| [0.025 0.975]
------------------------------------------------------------------------------
const 14.7180 0.193 76.352 0.000 14.330 15.106
x1 0.2404 0.343 0.702 0.486 -0.450 0.930
x2 -0.1302 0.258 -0.506 0.616 -0.649 0.389
x3 -0.3776 0.220 -1.716 0.093 -0.821 0.066
x4 0.3798 0.244 1.558 0.126 -0.111 0.871
x5 0.9857 0.469 2.104 0.041 0.042 1.929
x6 -0.4025 0.272 -1.480 0.146 -0.950 0.145
x7 -1.2683 0.423 -3.000 0.004 -2.120 -0.417
x8 0.7026 0.215 3.275 0.002 0.271 1.135
x9 0.5094 0.272 1.870 0.068 -0.039 1.058
x10 0.7827 0.304 2.578 0.013 0.171 1.394
==============================================================================
Omnibus: 6.231 Durbin-Watson: 2.002
Prob(Omnibus): 0.044 Jarque-Bera (JB): 6.369
Skew: -0.450 Prob(JB): 0.0414
Kurtosis: 4.385 Cond. No. 6.11
==============================================================================

## Compression Ratio (CR) Regression Summary

OLS Regression Results
==============================================================================
Dep. Variable: Compression ratio (CR) R-squared: 0.421
Model: OLS Adj. R-squared: 0.293
Method: Least Squares F-statistic: 3.274
Date: Tue, 05 Aug 2025 Prob (F-statistic): 0.00296
Time: 14:57:22 Log-Likelihood: 72.840
No. Observations: 56 AIC: -123.7
Df Residuals: 45 BIC: -101.4
Df Model: 10
Covariance Type: nonrobust
------------------------------------------------------------------------------
 coef std err t P>|t| [0.025 0.975]
------------------------------------------------------------------------------
const 0.3686 0.010 37.525 0.000 0.349 0.388
x1 -0.0586 0.023 -2.597 0.013 -0.104 -0.013
x2 0.0304 0.025 1.198 0.237 -0.021 0.082
x3 0.0312 0.017 1.871 0.068 -0.002 0.065
x4 -0.0502 0.016 -3.080 0.004 -0.083 -0.017
x5 0.0435 0.016 2.766 0.008 0.012 0.075
x6 0.0268 0.014 1.911 0.062 -0.001 0.055
x7 -0.0137 0.015 -0.890 0.378 -0.045 0.017
x8 -0.0447 0.020 -2.253 0.029 -0.085 -0.005
x9 0.0385 0.015 2.601 0.013 0.009 0.068
x10 -0.0425 0.014 -3.144 0.003 -0.070 -0.015
==============================================================================
Omnibus: 15.278 Durbin-Watson: 1.191
Prob(Omnibus): 0.000 Jarque-Bera (JB): 25.498
Skew: 0.852 Prob(JB): 2.91e-06
Kurtosis: 5.832 Cond. No. 7.85
==============================================================================
